# Supplementary material
Source: Springer Nature journal article supplement (https://www.springermedizin.de/resource/supplementary/12967_2013_1573_MOESM9_ESM.pdf/9574366)
Supplement: MOESM9 [file 9574366]

Text-mining for dementia-related hormone proteins and peptides



Curation against EndoNet database



Reconstruction of dementia-related hormone interaction network (DHN)



Filtering DHN down to seven convergent hormone signaling pathways



Pathway recovery test, evidence-based analysis, and biomarker-guided analysis



Translational analysis of the core interconnected network
